# Supplementary material
Source: publisher figshare collection journal article supplement (https://sage.figshare.com/ndownloader/files/22386597)
Supplement: Supplementary file 1 [file 22386597]

## Appendix

### Question Wording

Which statement below comes closest to your view of white nationalism in the military?

- There are no white nationalists in the military
- There are some white nationalists in the military
- There are many white nationalists in the military

Which statement below comes closest to your view of white nationalism in the military?

- White nationalism in the military is not a problem
- White nationalism in the military is somewhat serious problem
- White nationalism in the military is a serious problem

A poll in 2017 found that about 22 percent of service members have seen evidence of "white nationalism or racist ideology within the armed forces." Given these findings, **which statement below comes closest to your view of white nationalism in the military?**

- White nationalism in the military is not a problem
- White nationalism in the military is somewhat serious problem
- White nationalism in the military is a serious problem

Next, we'd like to get your feelings toward members of different institutions and organizations in the US using something called a feeling thermometer. Ratings between 50 degrees and 100 degrees mean that you feel favorable toward these groups of individuals. Ratings between 0 degrees and 50 degrees mean that you don't feel favorable toward these groups of individuals. You would rate a group of individuals at the 50 degree mark if you are indifferent in your feelings about them--that is, you do not feel either particularly favorable or unfavorable toward that group of individuals. Please rate your feelings toward the following groups, using the sliding scales below. Please note that **you must move the slider** in order to register a response. [RANDOMIZED]

0    10    20    30    40    50    60    70    80    90    100

|                                  |  |
|----------------------------------|--|
| Members of the Armed Services () |  |
| Members of Congress ()           |  |
| Climate Scientists ()            |  |
| Police Officers ()               |  |
| White People ()                  |  |
| Black People ()                  |  |

We hear a lot of talk these days about liberals and conservatives. Here is a seven-point scale on which the political views that people might hold are arranged from extremely liberal to extremely conservative. Where would you place yourself on this scale?

- Extremely liberal
- Liberal
- Slightly liberal
- Moderate; Middle of the road
- Slightly conservative
- Conservative
- Extremely conservative

### **Sample Summary Statistics & Analyses**

| <b>Variable</b> | <b>Sample</b> | <b>Benchmark</b> | <b>Benchmark Source</b> |
|-----------------|---------------|------------------|-------------------------|
| Female          | 51%           | 51%              | CPS 2017                |
| College Degree  | 40%           | 43%              | CPS 2017                |
| Black           | 12%           | 12%              | CPS 2017                |
| White           | 74%           | 73%              | CPS 2017                |
| Hispanic        | 13%           | 9%               | CPS 2017                |
| Democrat        | 39%           | 40%              | ANES (Wgt.)             |
| Republican      | 36%           | 31%              | ANES (Wgt.)             |
| Independent     | 25%           | 29%              | ANES (Wgt.)             |
| Mean Age        | 44            | 45               | ANES (Wgt.)             |
| Median Income   | 30-34,999     | 40-44,999        | ANES (Wgt.)             |

### Baseline Descriptive Statistics for Focal Variables

| Variable             | Mean | S.D. | Range | Valid N |
|----------------------|------|------|-------|---------|
| Prevalence           | 2.10 | 0.54 | 1,3   | 865     |
| Pretreatment Concern | 2.08 | 0.72 | 1,3   | 776     |
| Treatment Concern    | 2.12 | 0.76 | 1,3   | 1694    |

**Table 1: Correlates of Believing WN is a Problem (Logistic Regression)**

Number of Obs = 1682

Lr chi2(6) = 200.11

Prob > chi2 = 0.0000

Pseudo R2 = 0.0953

Log likelihood = -949.58495

| Var               | Coef.      | Std. Err. | z     | P> z  | [95% Conf. Interval] |            |
|-------------------|------------|-----------|-------|-------|----------------------|------------|
| wn treatment      | 0.3812976  | 0.1121184 | 3.4   | 0.001 | 0.1615496            | 0.6010456  |
| conservatism      | -1.822406  | 0.2179537 | -8.36 | 0.000 | -2.249588            | -1.395225  |
| mil feeling therm | -0.9216078 | 0.2520513 | -3.66 | 0.000 | -1.415619            | -0.4275964 |
| age               | -0.2697273 | 0.2325458 | -1.16 | 0.246 | -0.7255087           | 0.1860541  |
| female            | 0.1879152  | 0.1121558 | 1.68  | 0.094 | -0.0319062           | 0.4077366  |
| black             | 1.193599   | 0.1640287 | 7.28  | 0.000 | 0.8721089            | 1.51509    |
| _cons             | 0.4114176  | 0.2141486 | 1.92  | 0.055 | -0.008306            | 0.8311411  |

**Table 2: Conservatism Differential Treatment Effects: White Nationalism is a Serious Problem  
(Logistic Regression)**

Number of Obs = 1694

Lr chi2(6) = 119.58

Prob > chi2 = 0.0000

Pseudo R2 = 0.0566

Log likelihood = -996.72333

| Var                              | Coef.     | Std. Err. | z     | P> z  | [95% Conf. Interval] |           |
|----------------------------------|-----------|-----------|-------|-------|----------------------|-----------|
| wn treatment                     | .5194743  | .2109391  | 2.46  | 0.014 | .1060413             | .9329074  |
| conservatism                     | -1.895009 | .2876155  | -6.59 | 0.000 | -2.458725            | -1.331293 |
| wn treatment #<br>c.conservatism | -.3571597 | .4122755  | -0.87 | 0.386 | -1.165205            | .4508855  |
| _cons                            | -.0702363 | .1447671  | -0.49 | 0.628 | -.3539745            | .213502   |

**Table 3: Mil FT Differential Treatment Effects: White Nationalism is a Serious Problem  
(Logistic Regression)**

Number of Obs = 1682

Lr chi2(6) = 58.53

Prob > chi2 = 0.0000

Pseudo R2 = 0.0279

Log likelihood = -1020.3744

| Var                             | Coef.     | Std. Err. | z     | P> z  | [95% Conf. Interval] |           |
|---------------------------------|-----------|-----------|-------|-------|----------------------|-----------|
| wn treatment                    | -.3498188 | .353034   | -0.99 | 0.322 | -1.041753            | .3421151  |
| mil feeling<br>therm            | -1.982188 | .3177449  | -6.24 | 0.000 | -2.60495             | -1.359419 |
| wn treatment #<br>c.mil feeling | .945044   | .4622383  | 2.04  | 0.041 | .0390735             | 1.851014  |
| _cons                           | .51248    | .2388023  | 2.15  | 0.032 | .0444362             | .9805239  |
